# Supplementary figures and images for: Phylogeny, Taxonomy and Evolutionary Trade-Offs in Reproductive Traits of Gomphoid Fungi (Gomphaceae, Gomphales)
Source: MDPI journal article supplement (doi:10.3390/jof9060626), 2023-05-29

**A**

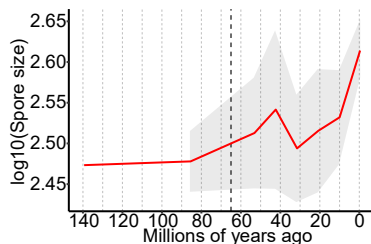

**B**

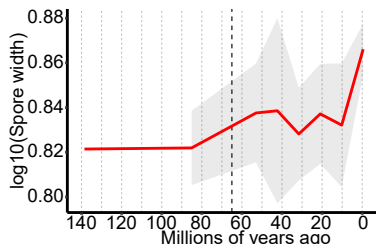

**C**

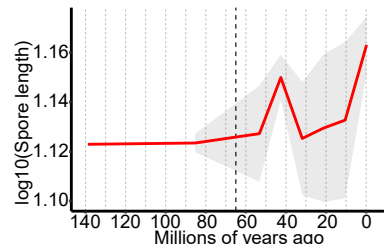

**D**

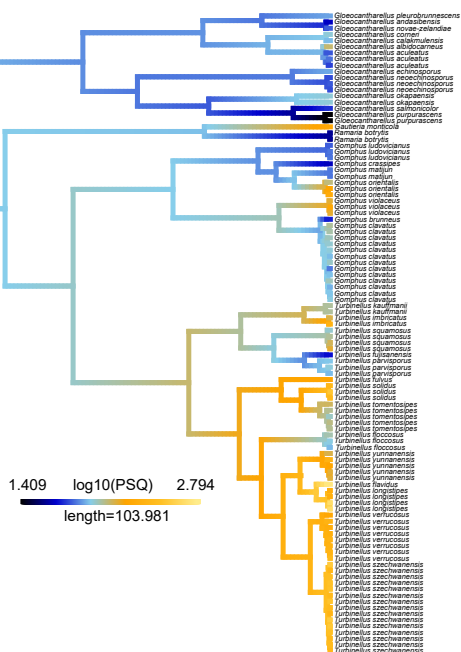

# E

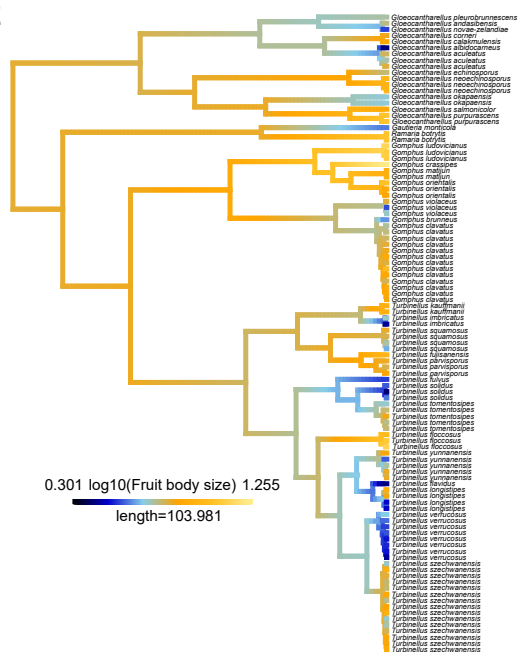**F**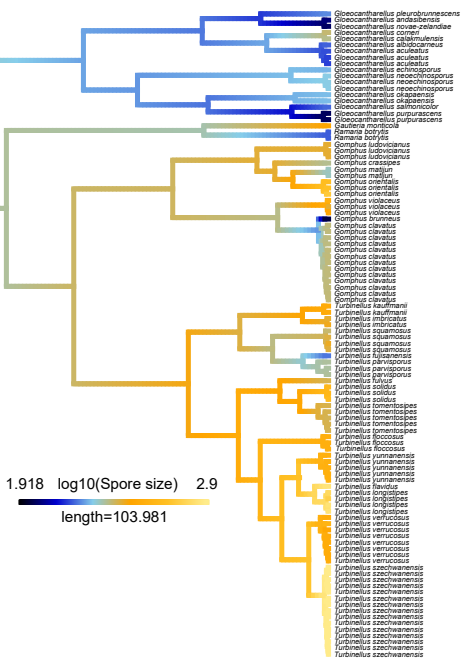

**G**

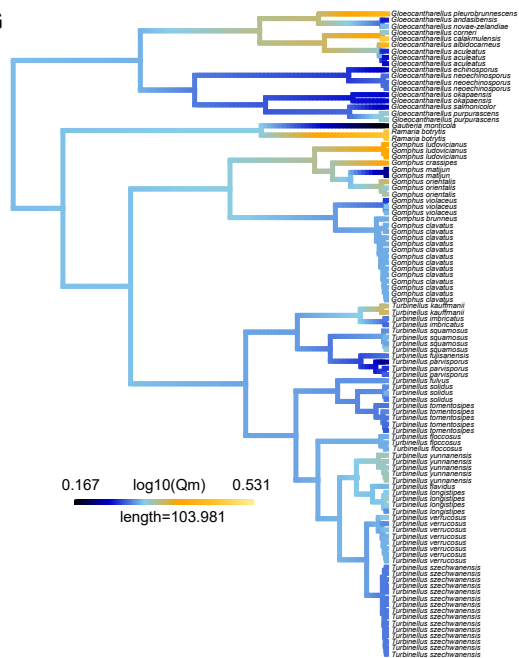

Supplement: s1 [file s1]
